# Supplementary material
Source: MDPI journal article supplement (https://www.mdpi.com/2038-8330/16/1/12)
Supplement: s1 [file s1]

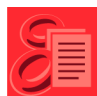

## Supplementary Materials

**Table S1.** Multivariable logistic regression analysis of severe thrombocytopenia with addition of platelet counts before AZA treatment.

| Factor                                     | Thrombocytopenia  |                |
|--------------------------------------------|-------------------|----------------|
|                                            | OR (95% CI)       | <i>p</i> Value |
| Dose of AZA: 75 mg/m <sup>2</sup>          | 0.47 (0.12–1.87)  | 0.282          |
| Days of AZA treatment: 7 days              | 1.46 (0.40–5.39)  | 0.570          |
| SMD                                        | 4.27 (1.13–16.10) | 0.032          |
| Platelet counts < 75 × 10 <sup>3</sup> /μL | 1.12 (0.31–4.07)  | 0.858          |

AZA, azacitidine; SMD: skeletal muscle depletion; OR, odds ratio; CI, confidence interval.
